# Supplementary material
Source: PubMed Central journal article supplement (PMC2957214)
Supplement: emboj2010212s1.pdf [file emboj2010212s1.pdf]

**An *in vivo* RNAi assay identifies major genetic and cellular requirements for primary piRNA biogenesis in *Drosophila***

Daniel Olivieri, Martina M. Sykora, Ravi Sachidanandam, Karl Mechtler and Julius Brennecke

**Table S1. Phenotypic Summary of *tj*-GAL4 driven RNAi against a collection of house-keeping genes**

| CG #    | Gene Name                           | VDRC ID | Library | Phenotype                  |
|---------|-------------------------------------|---------|---------|----------------------------|
| CG13410 | mitochondrial ribosomal protein L35 | 13443   | GD      | viable; very small ovaries |
| CG13410 | mitochondrial ribosomal protein L35 | 103388  | KK      | viable; very small ovaries |
| CG1913  | $\alpha$ -Tubulin at 84B            | 33427   | GD      | viable; no ovaries         |
| CG1913  | $\alpha$ -Tubulin at 84B            | 107109  | KK      | pharate lethal             |
| CG5353  | Threonyl-tRNA synthetase            | 7752    | GD      | viable; no ovaries         |
| CG5353  | Threonyl-tRNA synthetase            | 107265  | KK      | viable; very small ovaries |
| CG5363  | <i>cdc2</i>                         | 41838   | GD      | viable; no ovaries         |
| CG5363  | <i>cdc2</i>                         | 106130  | KK      | viable; no ovaries         |
| CG6253  | Ribosomal protein L14               | 44629   | GD      | viable; no ovaries         |
| CG6253  | Ribosomal protein L14               | 102011  | KK      | viable; no ovaries         |
| CG6349  | DNA polymerase $\alpha$ 180kD       | 11227   | GD      | viable; no ovaries         |
| CG6349  | DNA polymerase $\alpha$ 180kD       | 103699  | KK      | viable; no ovaries         |
| CG9075  | Eukaryotic initiation factor 4a     | 42202   | GD      | viable; no ovaries         |
| CG9075  | Eukaryotic initiation factor 4a     | 100310  | KK      | viable; no ovaries         |

**Table S2. Content Analysis of small RNA libraries obtained from Piwi-IPs.**

A. Statistics for reads

|                                                 | <b>tj &gt; <i>aub</i> RNAi</b> | <b>tj &gt; <i>piwi</i> RNAi</b> | <b>tj &gt; <i>armi</i> RNAi</b> | <b>tj &gt; <i>zuc</i> RNAi</b> | <b>tj &gt; <i>Yb</i> RNAi</b> |
|-------------------------------------------------|--------------------------------|---------------------------------|---------------------------------|--------------------------------|-------------------------------|
| <b>Total reads</b>                              | 9.547.451                      | 7.785.649                       | 5.409.376                       | 9.000.057                      | 13.466.053                    |
| <b>% of reads matching the genome 100%</b>      | 7.471.255                      | 5.499.917                       | 3.998.721                       | 5.005.875                      | 10.933.088                    |
| <b># of reads mapping to rRNA, tRNA, snoRNA</b> | 522.429                        | 779.521                         | 210.185                         | 645.291                        | 899.389                       |
| <b># of analyzed reads</b>                      | 6.948.826                      | 4.720.396                       | 3.788.536                       | 4.360.584                      | 10.033.699                    |
| <b>repeats</b>                                  | 83.0 %                         | 84.4 %                          | 85.1 %                          | 84.2 %                         | 83.3 %                        |
| <b>no annotation</b>                            | 9.6 %                          | 9.0 %                           | 9.2 %                           | 9.1 %                          | 9.0 %                         |
| <b>exons</b>                                    | 5.0 %                          | 4.4 %                           | 3.7 %                           | 4.0 %                          | 5.8 %                         |
| <b>introns</b>                                  | 1.7 %                          | 1.5 %                           | 1.6 %                           | 1.3 %                          | 1.4 %                         |
| <b>Pre-miRNAs</b>                               | 0.6 %                          | 0.6 %                           | 0.3 %                           | 1.2 %                          | 0.4 %                         |

B. Statistics for species

|                                                   | <b>tj &gt; <i>aub</i> RNAi</b> | <b>tj &gt; <i>piwi</i> RNAi</b> | <b>tj &gt; <i>armi</i> RNAi</b> | <b>tj &gt; <i>zuc</i> RNAi</b> | <b>tj &gt; <i>Yb</i> RNAi</b> |
|---------------------------------------------------|--------------------------------|---------------------------------|---------------------------------|--------------------------------|-------------------------------|
| <b>Total species</b>                              | 2.433.473                      | 1.988.666                       | 1.796.123                       | 1.566.130                      | 3.193.174                     |
| <b>% of species matching the genome 100%</b>      | 1.336.025                      | 1.001.251                       | 961.431                         | 647.626                        | 1.907.157                     |
| <b># of species mapping to rRNA, tRNA, snoRNA</b> | 28.943                         | 28.163                          | 23.412                          | 18.752                         | 44.430                        |
| <b># of analyzed species</b>                      | 1.307.082                      | 973.088                         | 938.019                         | 628.874                        | 1.862.727                     |
| <b>repeats</b>                                    | 72.8 %                         | 75.8 %                          | 76.9 %                          | 77.7 %                         | 70.1 %                        |
| <b>no annotation</b>                              | 11.2 %                         | 10.5 %                          | 10.9 %                          | 10.0 %                         | 11.2 %                        |
| <b>exons</b>                                      | 11.4 %                         | 10.4 %                          | 8.6 %                           | 9.4 %                          | 15.2 %                        |
| <b>introns</b>                                    | 4.6 %                          | 3.3 %                           | 3.6 %                           | 2.8 %                          | 3.5 %                         |
| <b>Pre-miRNAs</b>                                 | 0.0 %                          | 0.1 %                           | 0.0 %                           | 0.1 %                          | 0.0 %                         |

actin GAL4 flip-out clones expressing *piwi*-dsRNA

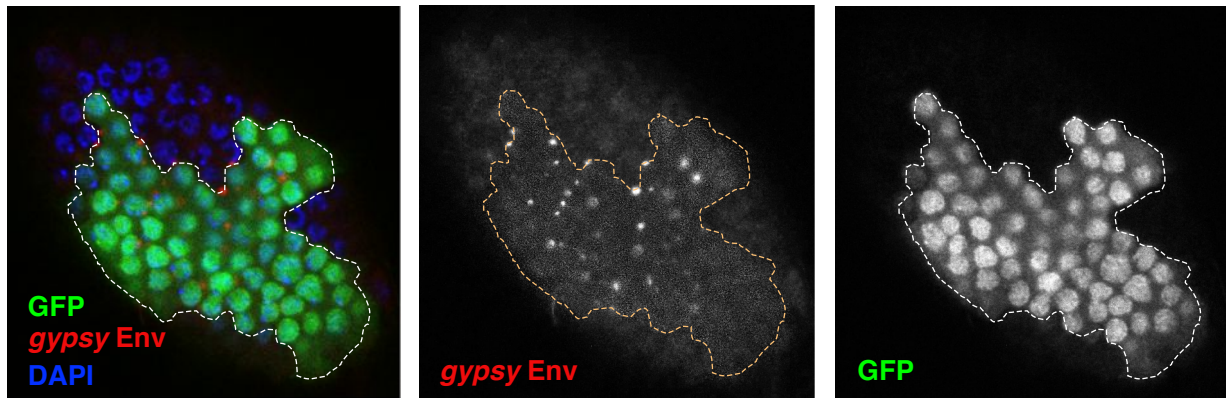

**Figure S1. Specific de-silencing of *gypsy* in clones expressing *piwi*-dsRNA.**

Shown is a surface view on the follicular epithelium of an egg chamber stained with *gypsy*-Env (red), GFP (green) and DAPI (blue). Cells expressing the dsRNA hairpin against *piwi* are marked with GFP.

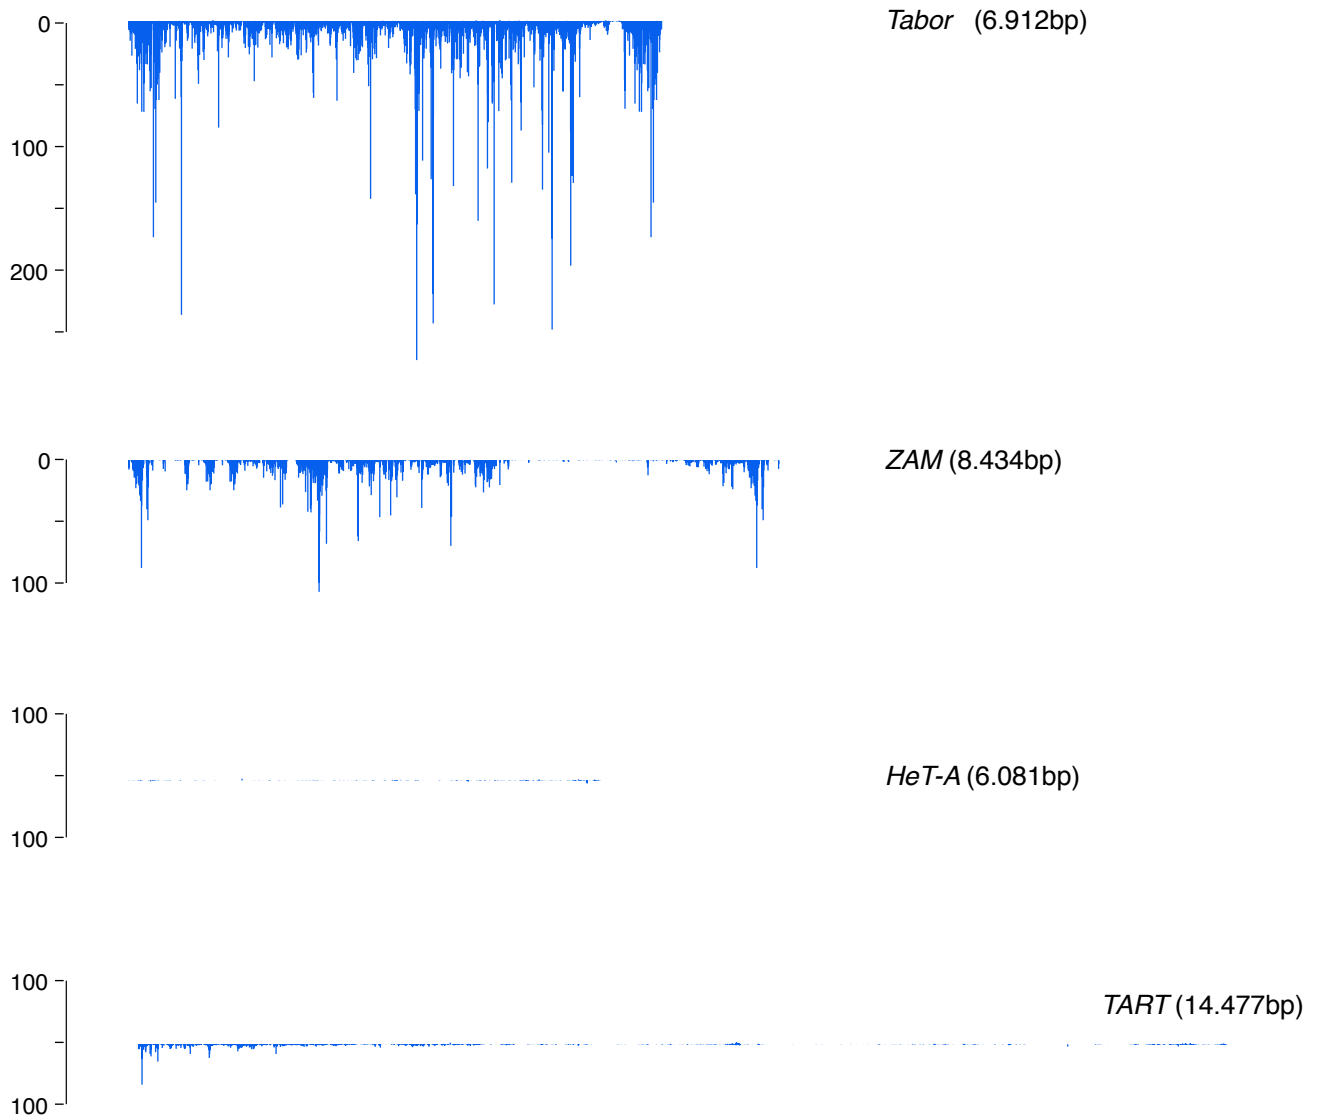

**Figure S2. piRNA profiles mapping to *Tabor*, *ZAM*, *HeT-A* and *TART* elements in OSC cells.**

Small RNA data from Robine et al. 2009 was used to map OSC derived 23-32nt small RNAs to the indicated retro-elements. Peaks pointing down indicate antisense piRNAs, those pointing up correspond to sense piRNAs. All four plots are shown at the same scale. The profiles have a single nt resolution along the x-axis and the y-axis indicates reads per 1 million sequenced RNAs (excluding miRNA, rRNA, tRNA and snoRNA species).

A

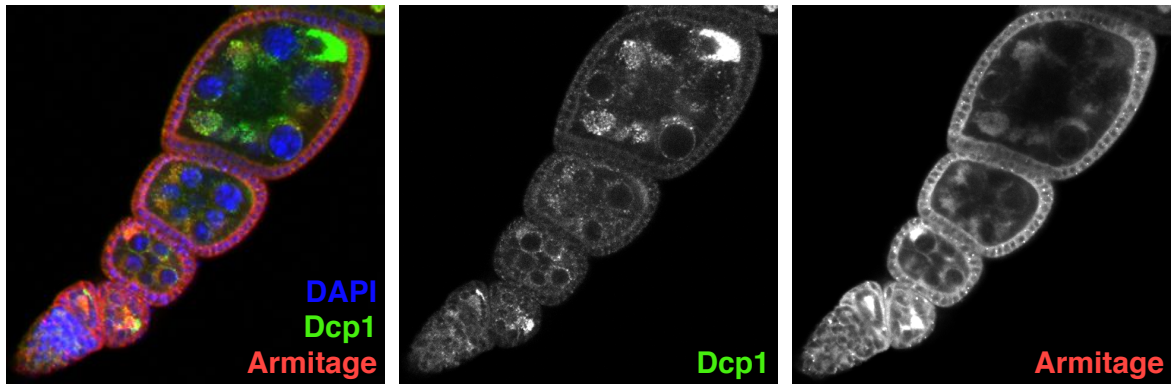

B

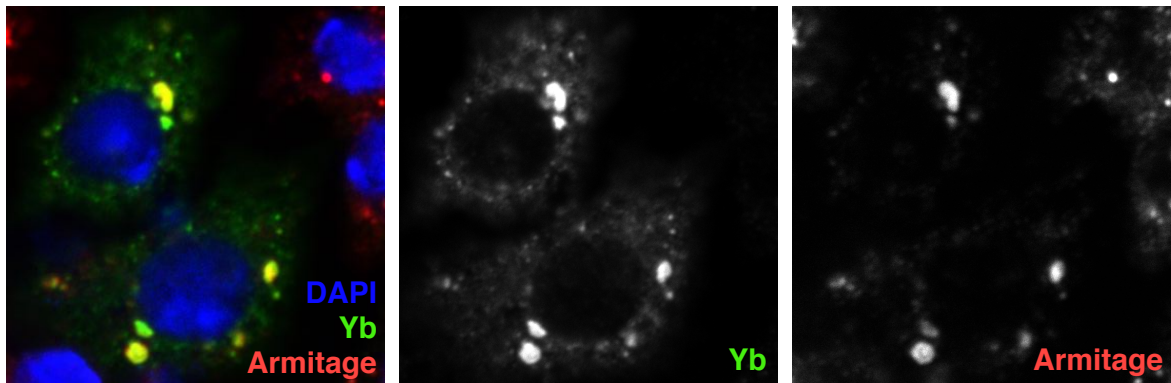

**Figure S3. Armitage, Yb and DCP1 localization in OSC cells and ovaries.**

(A) Shown is an ovariole expressing YFP-DCP1 (green) stained for Armitage (red) and DNA (blue).  
(B) Shown are OSC cells transiently transfected with GFP tagged Yb (green) and stained for Armitage (red) and DNA (blue).

mitotic FRT clones for *Yb[72]*

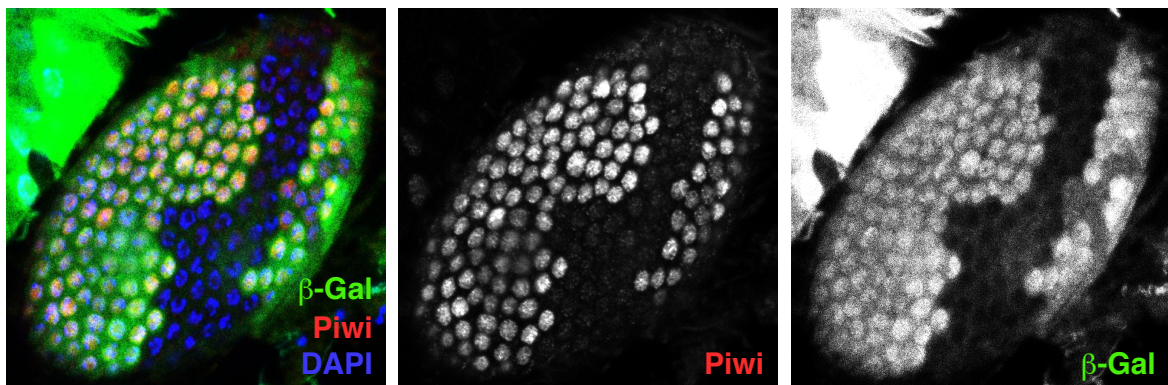

**Figure S4. Follicle cells lacking *Yb* lose nuclear Piwi localization.**

Shown is a surface view onto an egg chamber containing a mitotic clone for the *fs(1)Yb[72]* null allele stained for Piwi (red), β-Gal (green) and DNA (blue). The clone is marked by the absence of β-Gal (green).

*armi* [ $\Delta 1$ ] / *TM3*

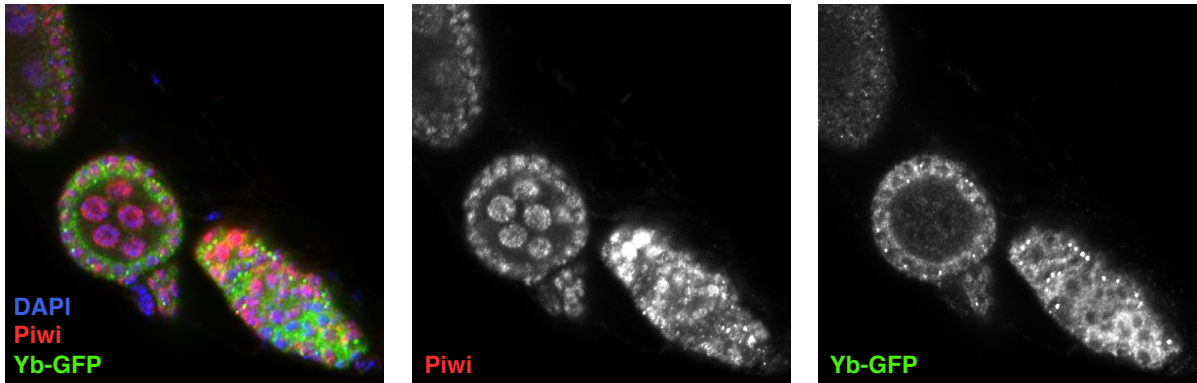

*armi* [ $\Delta 1$ ] / *armi* [ $\Delta 1$ ]

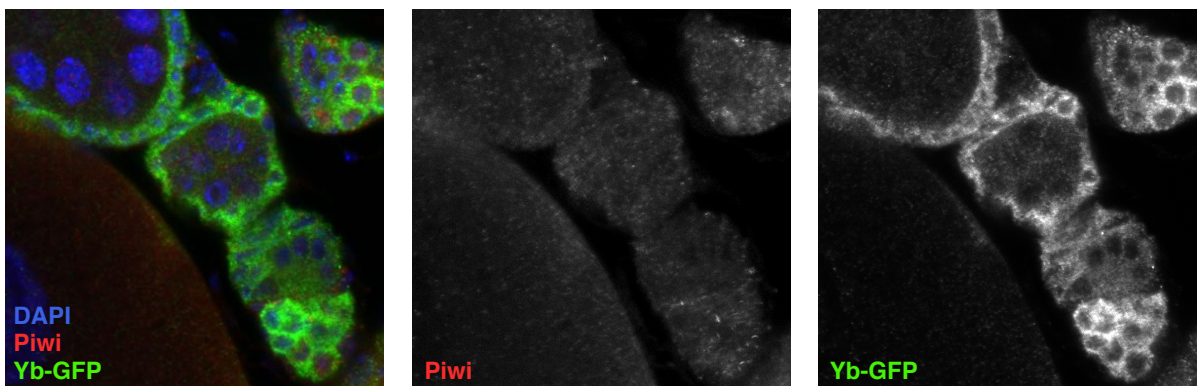

**Figure S5. Armitage is required for Yb localization to cytoplasmic foci.**

Shown are confocal sections through ovarioles heterozygous (top) or homozygous (bottom) for the *armi* [ $\Delta 1$ ] deletion carrying a Yb-GFP (green) transgene and stained for Piwi (red) and DNA (blue).

**A**mitotic FRT clones for *zuc*[*HM27*]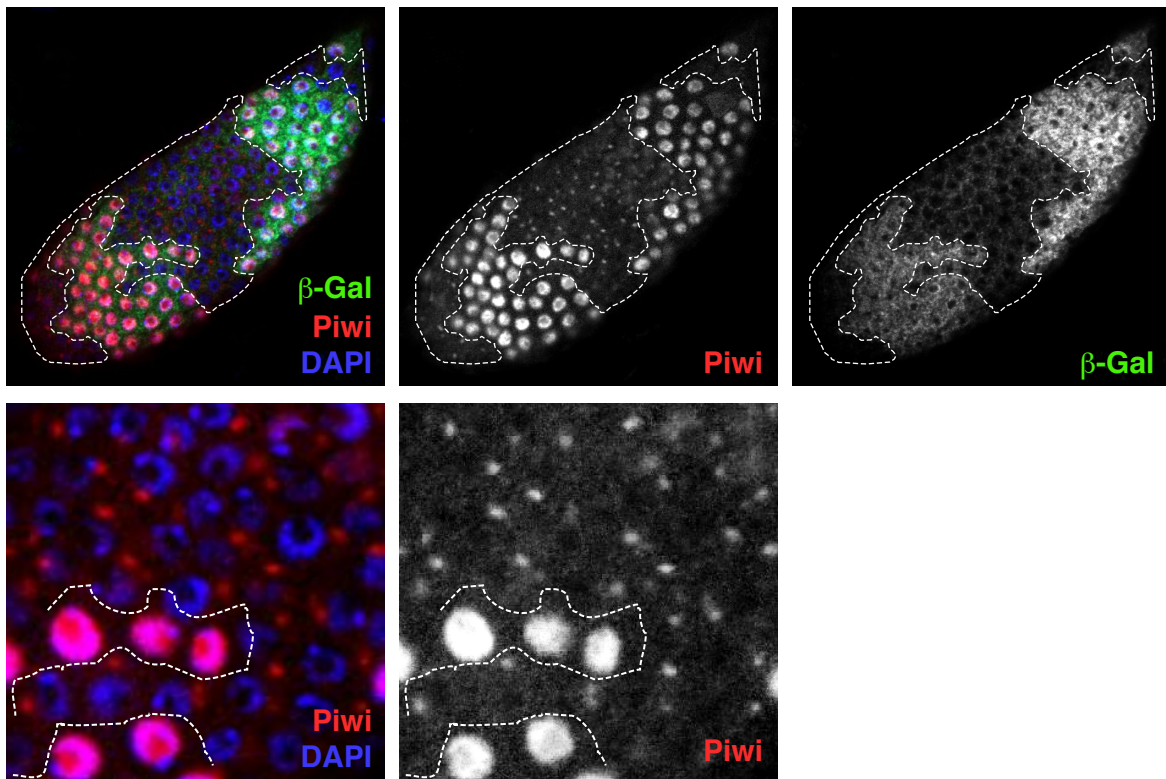**B**mitotic FRT clones for *zuc*[*HM27*]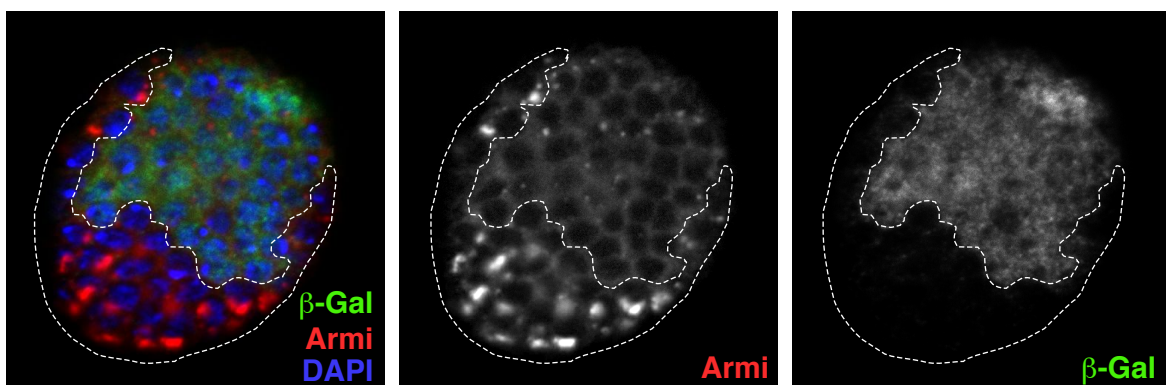**Figure S6. Follicle cells lacking Zuc exhibit Piwi localization to Yb-bodies.**

(A) Shown is a surface view onto an egg chamber containing mitotic clones for the *zuc*[*HM27*] null allele stained for Piwi (red),  $\beta$ -Gal (green) and DNA (blue). The clones are marked by the absence of  $\beta$ -Gal (green) and is encircled by a dashed line. The lower panels show a magnified view. (B) Shown is a surface view onto an egg chamber containing mitotic clones for the *zuc*[*HM27*] null allele stained for Armi (red),  $\beta$ -Gal (green) and DNA (blue). The clone is marked by the absence of  $\beta$ -Gal (green) and encircled by a dashed line.



OSC cells transfected with GFP-Piwi

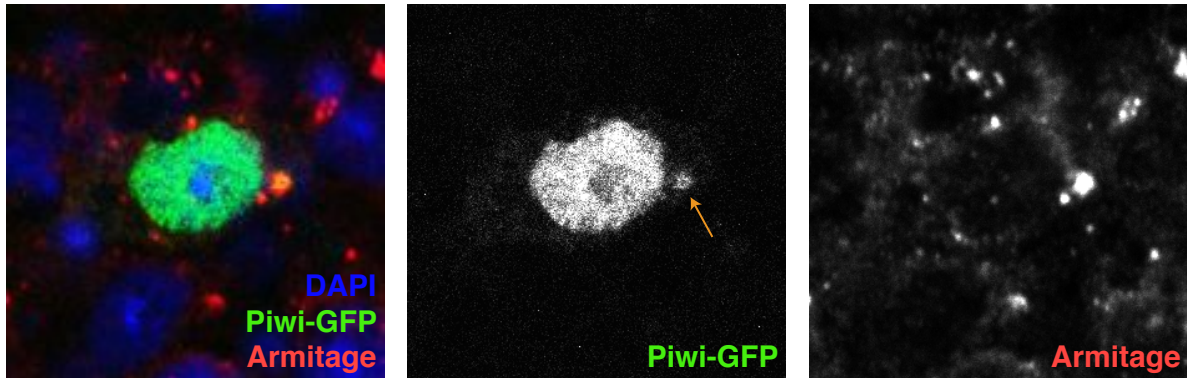

**Figure S7. OSC cells transiently expressing GFP-Piwi show Piwi localization to Armi-foci.** Shown are OSC cells chemically transfected with GFP-Piwi (green) stained for Armitage (red) and DNA (DAPI, blue). The arrow points to the Piwi staining co-localizing with Armi.

flip out clones expressing *zuc* and *armi* dsRNA

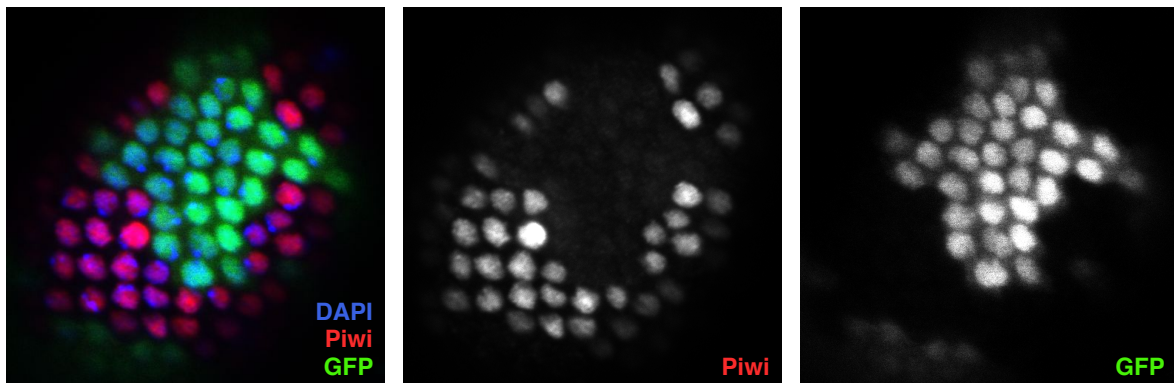

**Figure S8. Armitage is required for Piwi localization to Yb-bodies**

Shown is a surface view onto the follicular epithelium of an egg chamber containing clones expressing dsRNA hairpins against *zuc* and *armi* stained for Piwi (red) and DNA (DAPI; blue). The clone is marked by the presence of GFP (green).

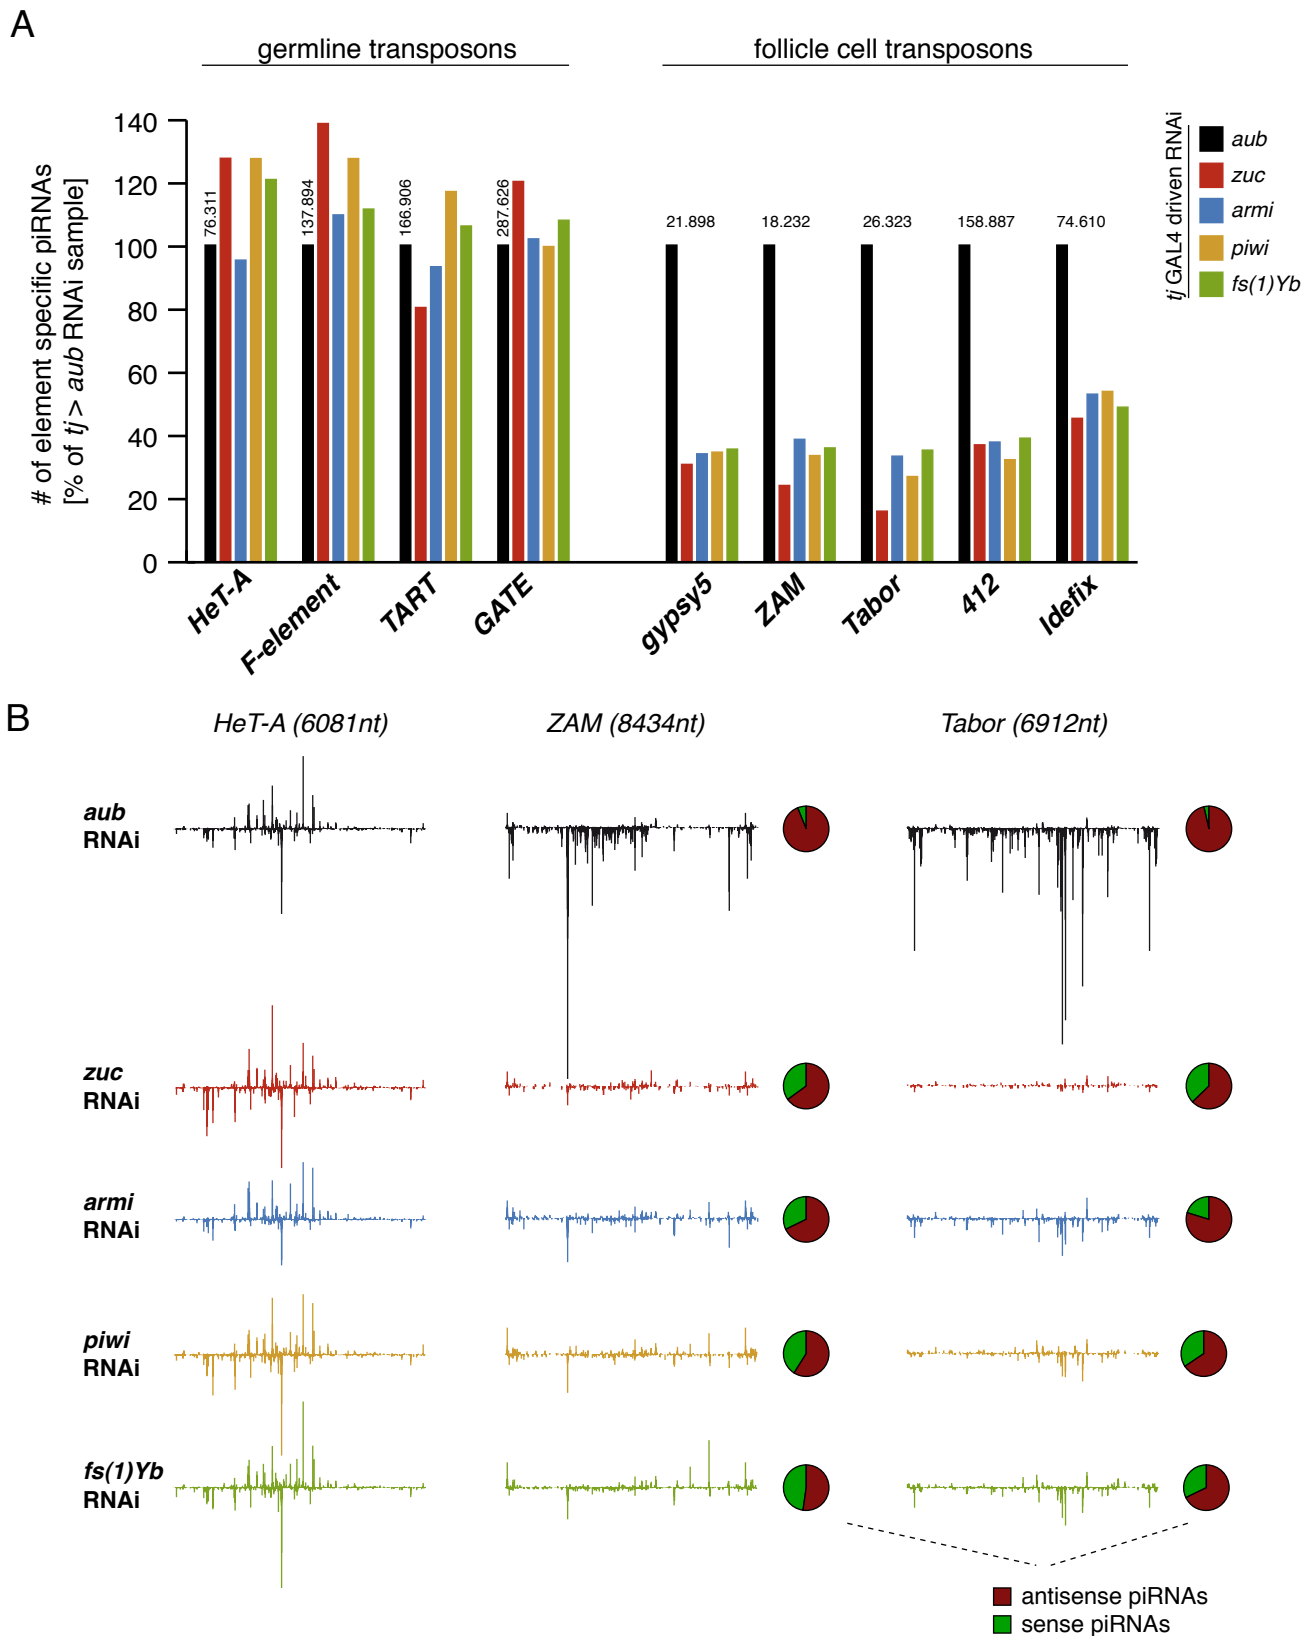

**Figure S9. piRNA biogenesis defects in the absence of Zuc, Armi and Yb.**

(A) Shown are relative levels of Piwi-piRNAs from ovaries of the indicated genotypes mapping to the indicated transposons. Elements silenced preferentially in the germline are to the left whereas elements with specific silencing in somatic support cells are to the right (based on Malone et al. 2009). Libraries were normalized via the genome-unique mappers to 42AB, a germline specific piRNA cluster (Fig. 5). The *tj-GAL4>aub-RNAi* sample acts as control and the raw numbers of this sample are indicated above the black bars. (B) Detailed piRNA profiles across the transposons *HetA*, *ZAM* and *Tabor*. The color code is as in (A). Cake diagrams indicate the levels of sense (green) and antisense (red) piRNAs mapping to the indicated transposons.

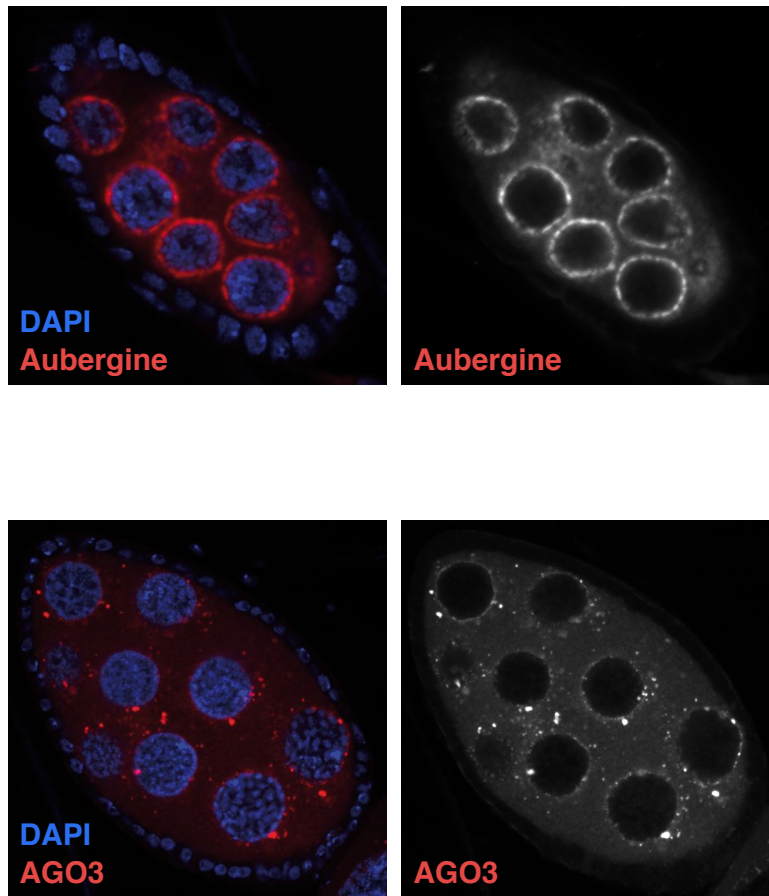

**Figure S10. Aubergine and AGO3 localization in *zuc* mutant egg chambers.**

Shown are confocal sections through *zuc*[*HM27*]/*zuc*[*Def*] egg chambers stained for Aubergine (top) and AGO3 (bottom). DNA was visualized with DAPI (blue).

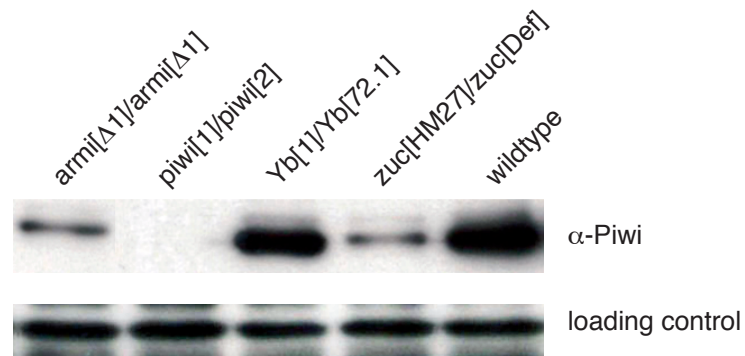

**Figure S11. Piwi levels are reduced in primary piRNA biogenesis mutants.**

Shown is a western blot against Piwi from ovarian extracts of the indicated mutants. The lower western blot indicates consistent loading.
